# Supplementary material for: Sheep genome functional annotation reveals proximal regulatory elements contributed to the evolution of modern breeds
Source: PubMed Central journal article supplement (PMC5830443; doi:10.1038/s41467-017-02809-1), 2018-02-28
Supplement: 41467_2017_2809_MOESM1_ESM.pdf [file 41467_2017_2809_MOESM1_ESM.pdf]

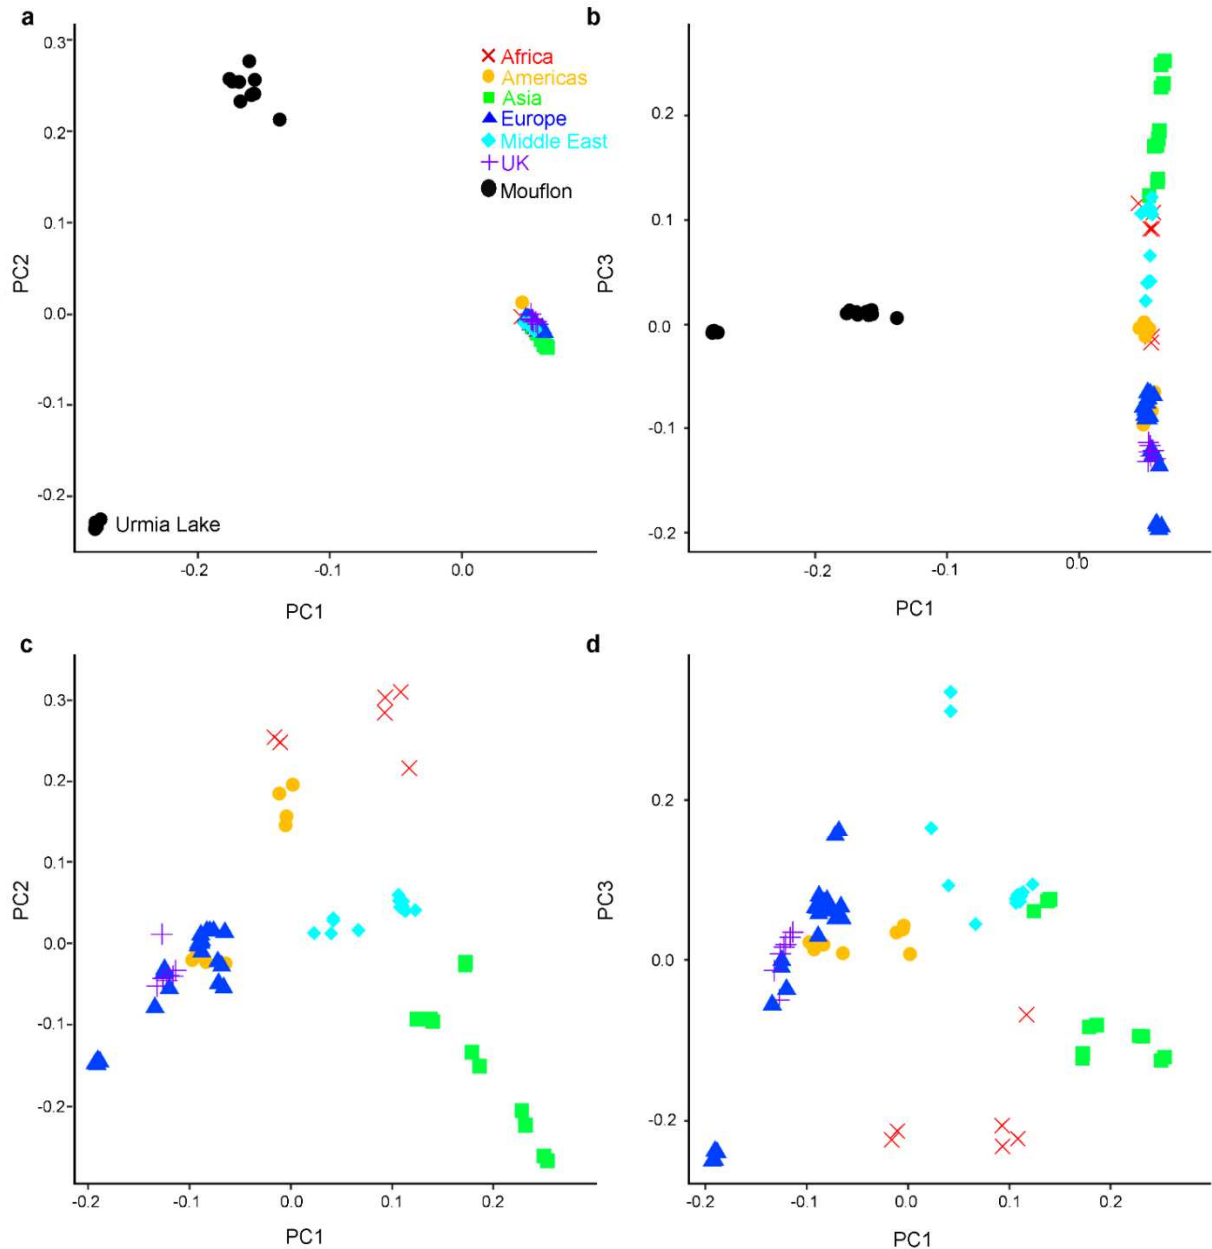

**Supplementary Figure 1 | Genomic relationship between individual animals using PCA of pairwise genetic distance.** PCA was performed using PLINK v1.90 on a SNP subset identified by LD pruning across genome bins (--indep-pairwise 500 5 0.3). **(a)** All animals plotted for PC1 (6.2%) and PC2 (3.2% of variation). Domestic sheep cluster together and separate from two distinct mouflon populations representing distinct locations. **(b)** All animals plotted for PC1 and PC3 (2.5% variation), capturing variation between domestic sheep genomes. **(c)** Analysis of domestic sheep alone using PC1 (2.5 %) and PC2 (1.8% variation) more clearly demonstrates phylogeographic structure. **(d)** Analysis of domestic sheep alone using PC1 (2.5 %) and PC3 (1.6%).

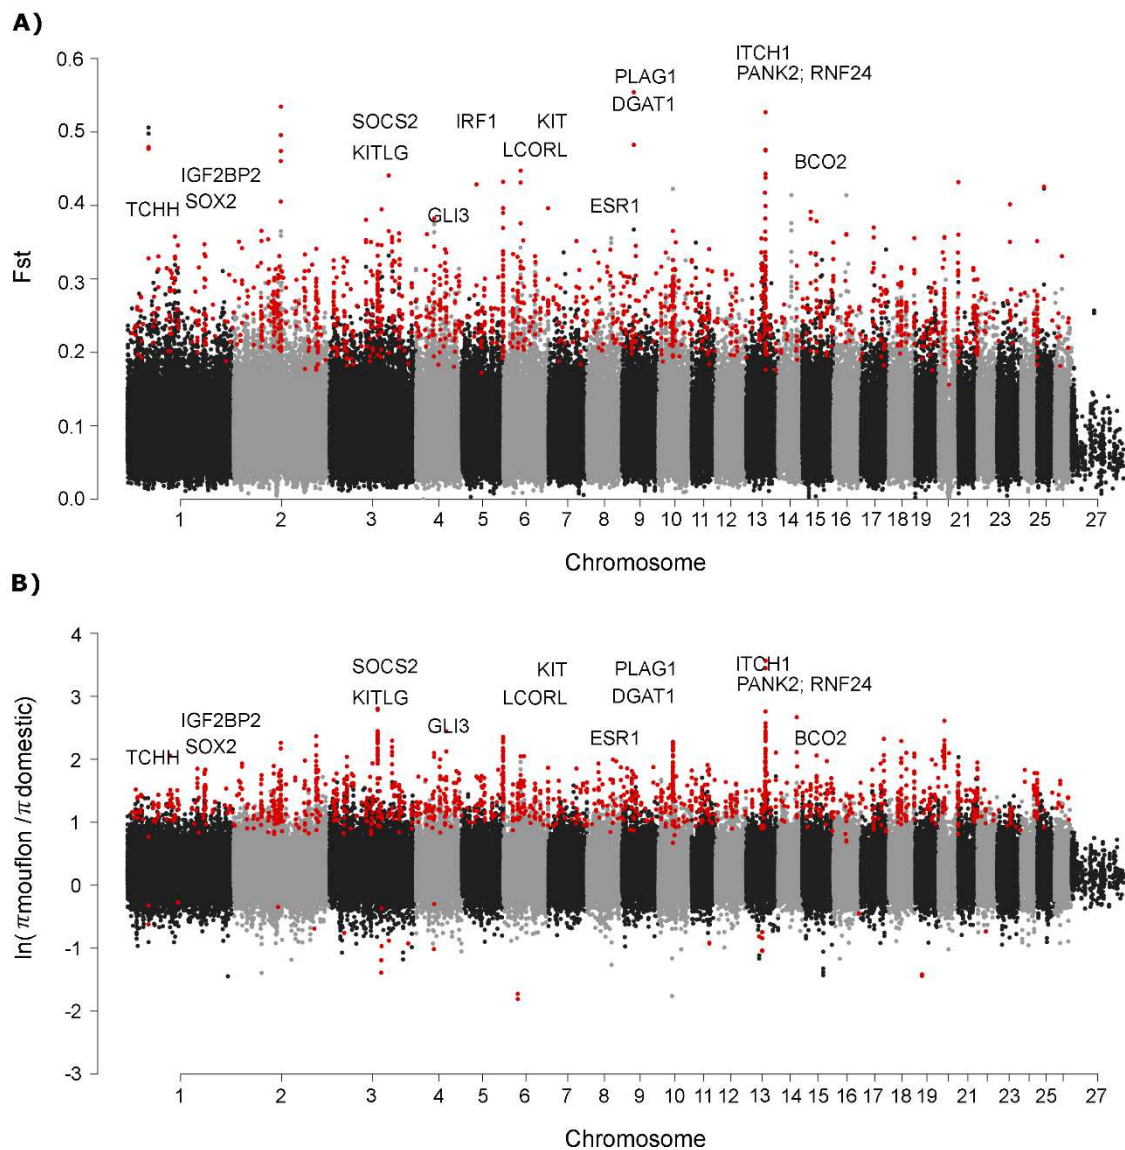

**Supplementary Figure 2 | Genome-wide distribution of two selection sweeps metrics. (a)**  $F_{ST}$  comparing domestic and wild sheep genomes averaged in 20 kb genomic bins and plotted in genomic order. Bins highlighted in red are identified as outliers likely to be enriched for selection sweeps after joint consideration of both metrics (refer to Figure 2 and methods). **(b)** Log difference in nucleotide diversity between species. Positive values represent 20 kb genomic bins with depressed nucleotide diversity in 67 domestic sheep genomes compared with 17 wild Mouflon. Genes are identified that have been implicated previously in studies of domestication or variation in production traits.

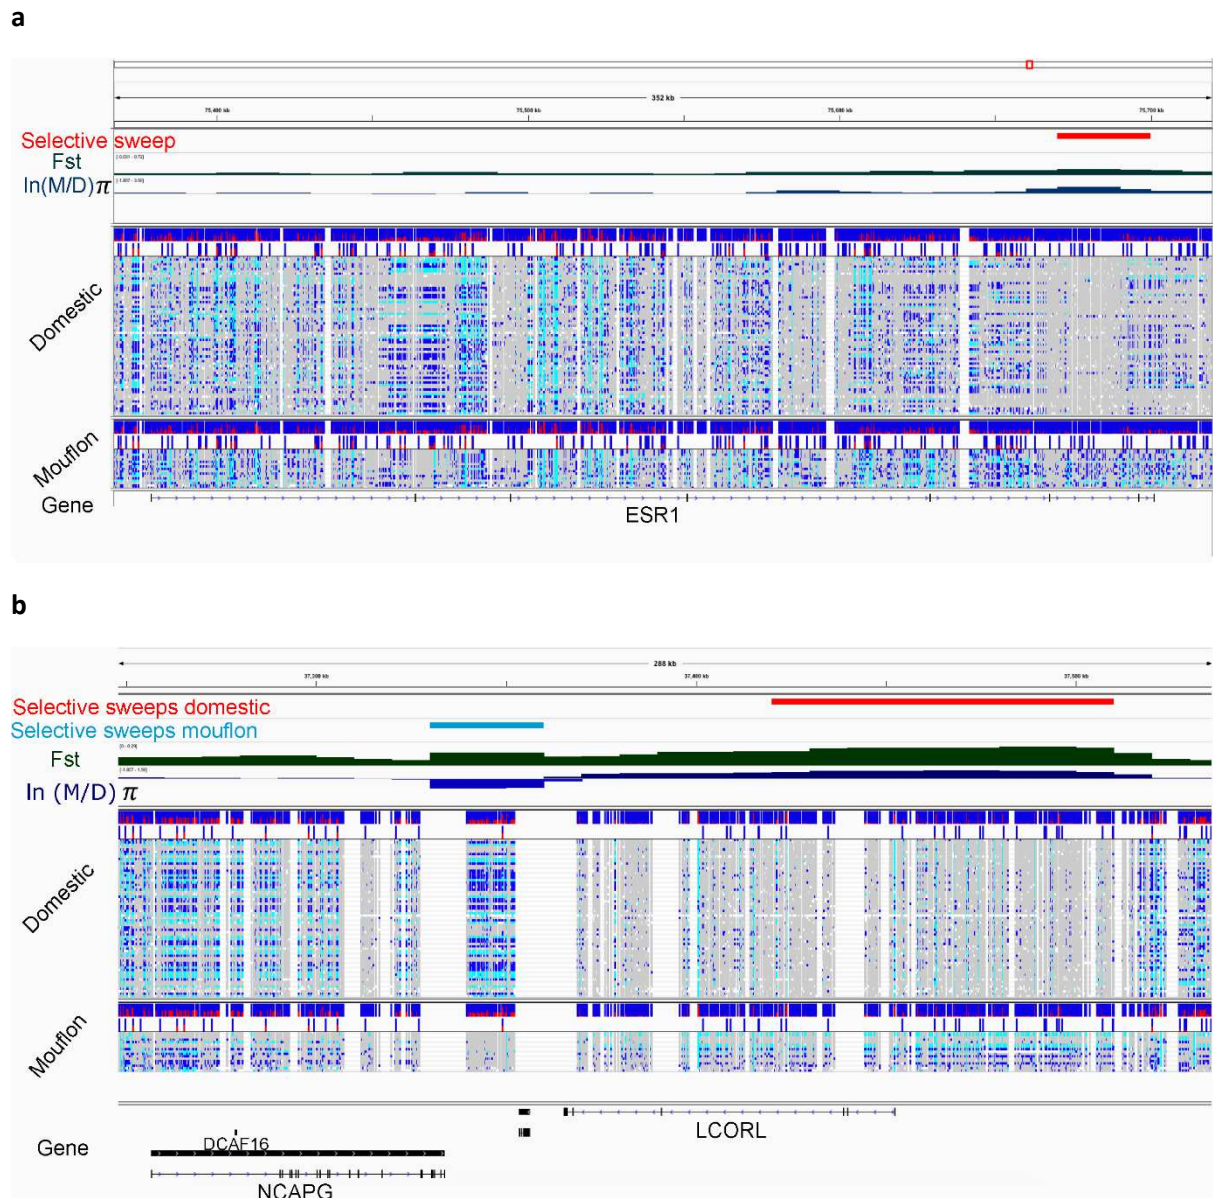

**Supplementary Figure 3 | Illustration of two sweep regions. (a)** The integrative genome viewer (IGV) was used to plot a 350 kb region of sheep chromosome 8 containing *ESR1*. The genotypic status for each genome is given as heterozygous (dark blue) or homozygous for the reference (grey) or alternate allele (light blue). Annotation tracks highlight the outlier region (red bar) arising from joint consideration of the two selection sweep metrics (black and blue bars). The location of *ESR1* exons is given at the bottom. Note the sweep is characterized by a lack of variability amongst domestic sheep genomes. **(b)** IGV plot spanning 288 kb of chromosome 6 (Mb 37.2 – 37.5) containing *NCAPG* and *LCORL*. The region exhibits evidence of selection within both domestic sheep (red) and wild mouflon (aqua-blue).

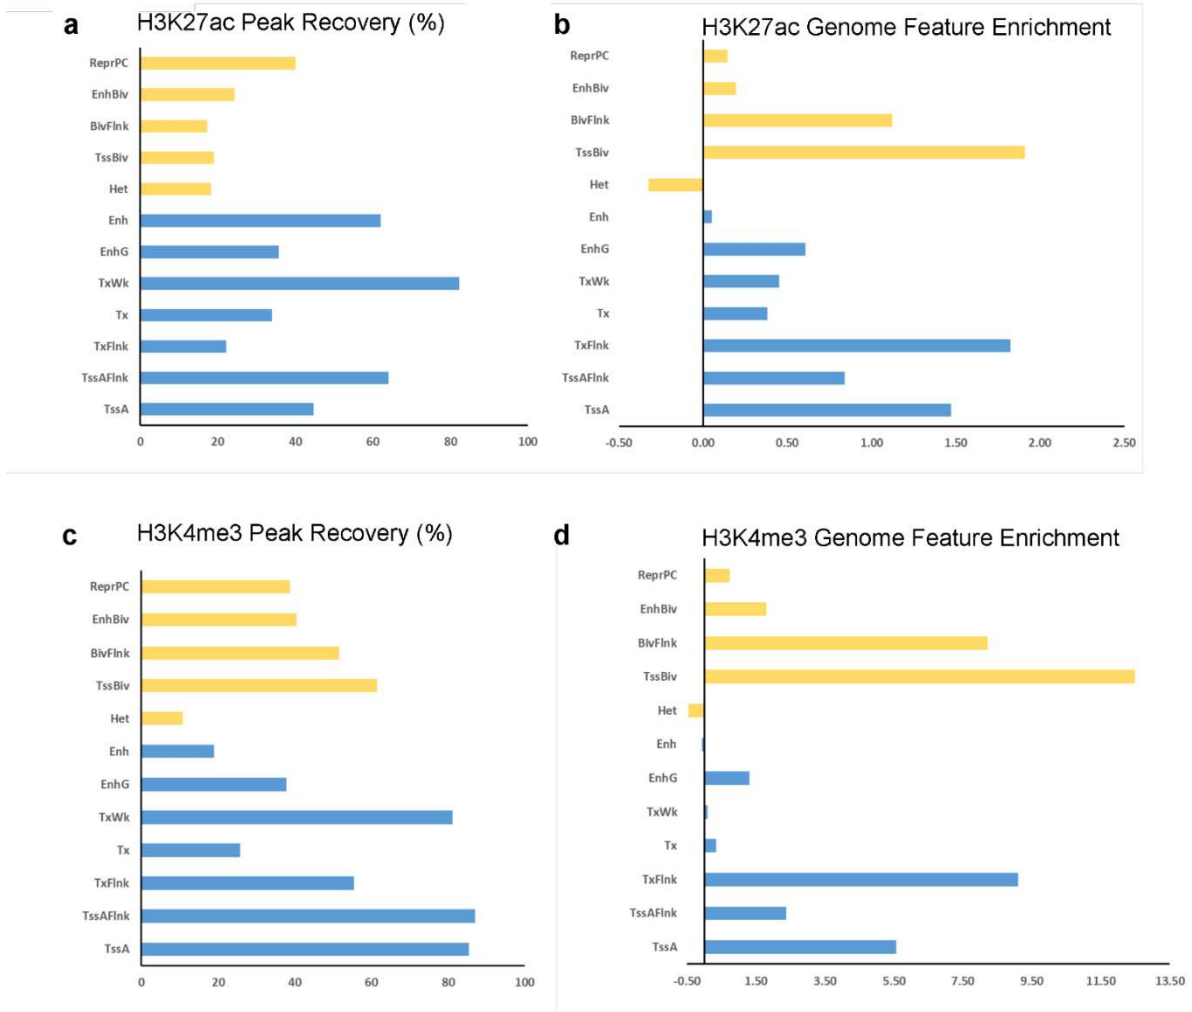

**Supplementary Figure 4 | Recovery of experimentally defined sheep promoters and enhancers in predicted epigenome features. (a)** ChIP-seq analysis of sheep adipose tissue using H3K27ac identified 35622 peaks enriched for active promoters and enhancers. The percentage peak recovery within each of 12 predicted epigenome marks is shown. **(b)** Given the predicted epigenome marks span a variable amount of the sheep genome, fold enrichment analysis was performed following 1000 randomizations. Increasingly positive values indicate elevated recovery beyond expectation. Epigenome features predicted from human Epigenome Roadmap active (blue) and repressive (yellow) chromatin states are coloured separately. **(c)** ChIP-seq analysis of sheep adipose tissue using H3K4me3 identified 16098 peaks tagging active promotor elements. Recovery of predicted epigenome features is shown, along with **(d)** fold enrichment for promoters estimated 1000 randomizations.

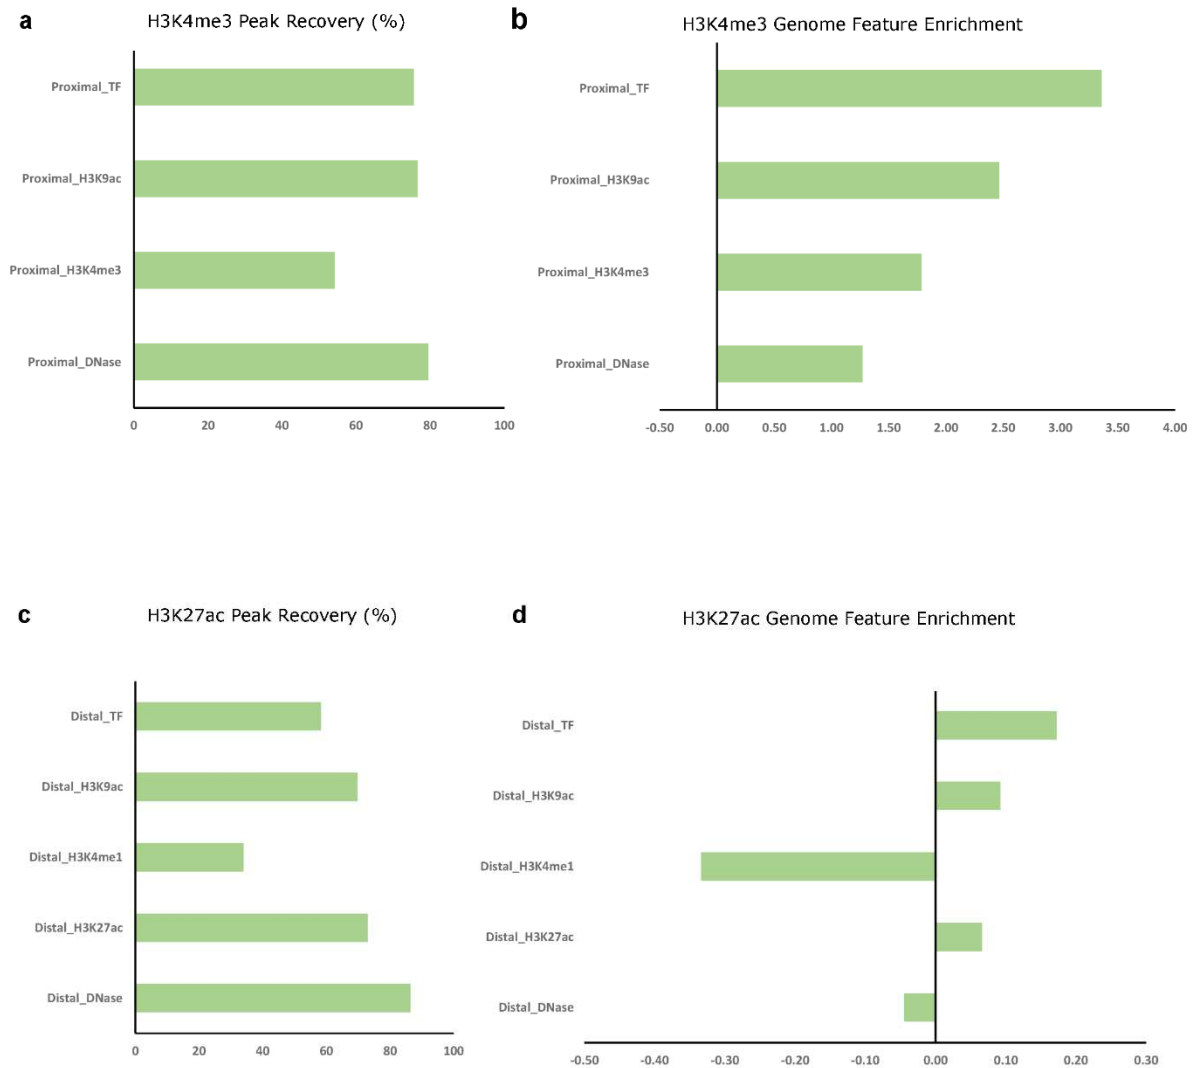

**Supplementary Figure 5 | Recovery of experimentally defined sheep promoters and enhancers in predicted distal and proximal genome features.** Predicted proximal genome features from ENCODE cell lines assessed against experimentally obtained sheep promoters using H3K4me3 ChIP-seq (16098 peaks) **(a,b)** and predicted distal genome features from ENCODE cell lines were assessed against experimentally obtained sheep enhancers (H3K27ac peaks – H3K4me3 peaks by ChIP-seq; 26000 peaks) **(c,d)**. **(a)** The proportion of H3K4me3 overlapping with each genome feature is given as a percentage. **(b)** Fold enrichment was estimated following 1000 randomizations to establish the number of overlaps expected by chance. **(c)** The proportion of H3K27ac with no H3K4me3 signal (enhancers) overlapping with each genome feature is given as a percentage. **(d)** Fold enrichment was estimated following 1000 randomizations to establish the number of overlaps expected by chance.

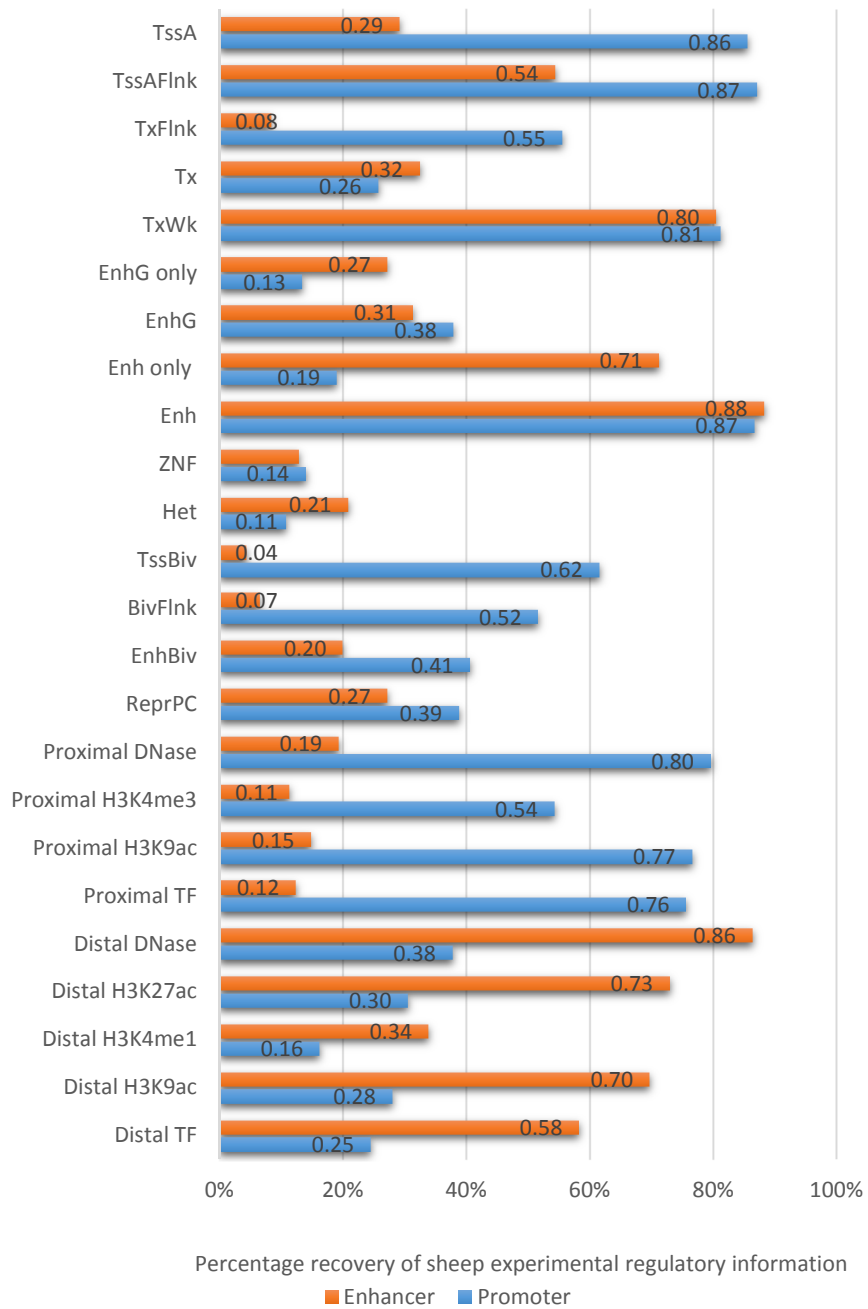

**Supplementary Figure 6 | Validation of predicted regulatory features using ChIP-Seq data.** The availability of experimentally derived H3K4me3 histone modification (marking proximal promoters), and H3K27ac (marking both enhancers and promoters), allows us to distinguish between these two categories of regulatory elements. We define promoters (blue) as peaks identified using H3K4me3. We define enhancers (orange) as H3K27ac peaks not identified by H3K4me3. This approach was also applied to the predicted genome features. The ‘Enh only’ predicted feature represents the Roadmap Enhancers ‘Enh’, following subtraction of promotor regions identified as ‘TssA’. The recovery of each predicted genome features is shown separately within our experimentally derived promotor and enhancers.

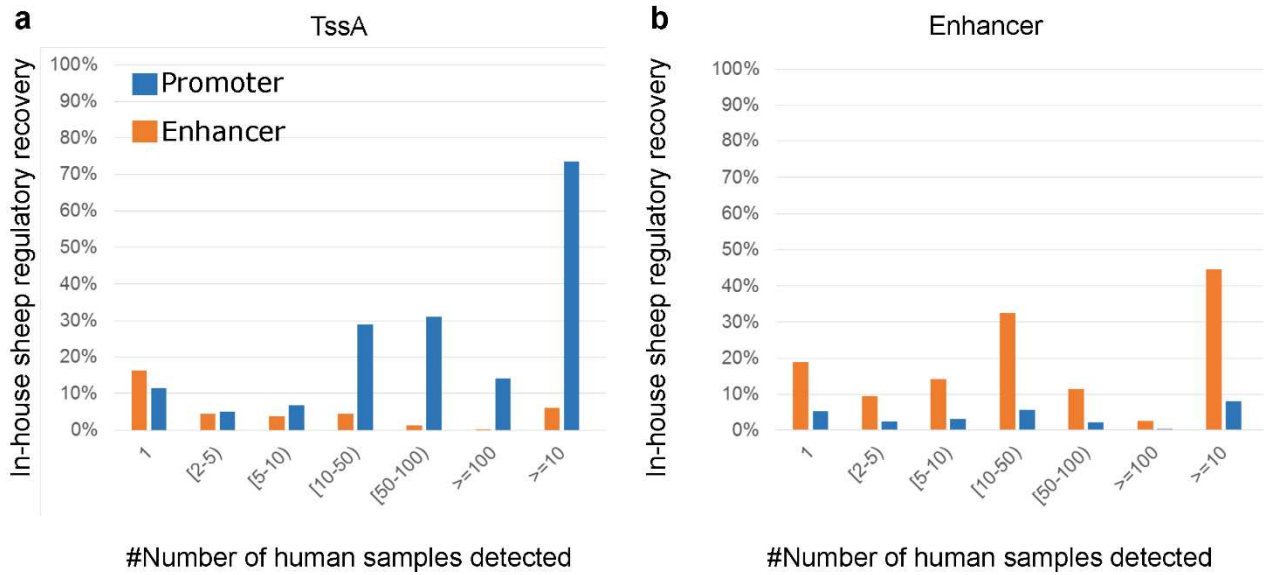

**Supplementary Figure 7 | Validation of sheep promoter (blue) and enhancer (orange) recovery from (a) chromHMM TssA mark, based on the number of human samples detected (tissue-specificity) (b) Predicted enhancers based on RoadMap chromHMM excluding enhancer overlapping chromHMM TssA, based on the number of human samples detected (tissue-specificity).**

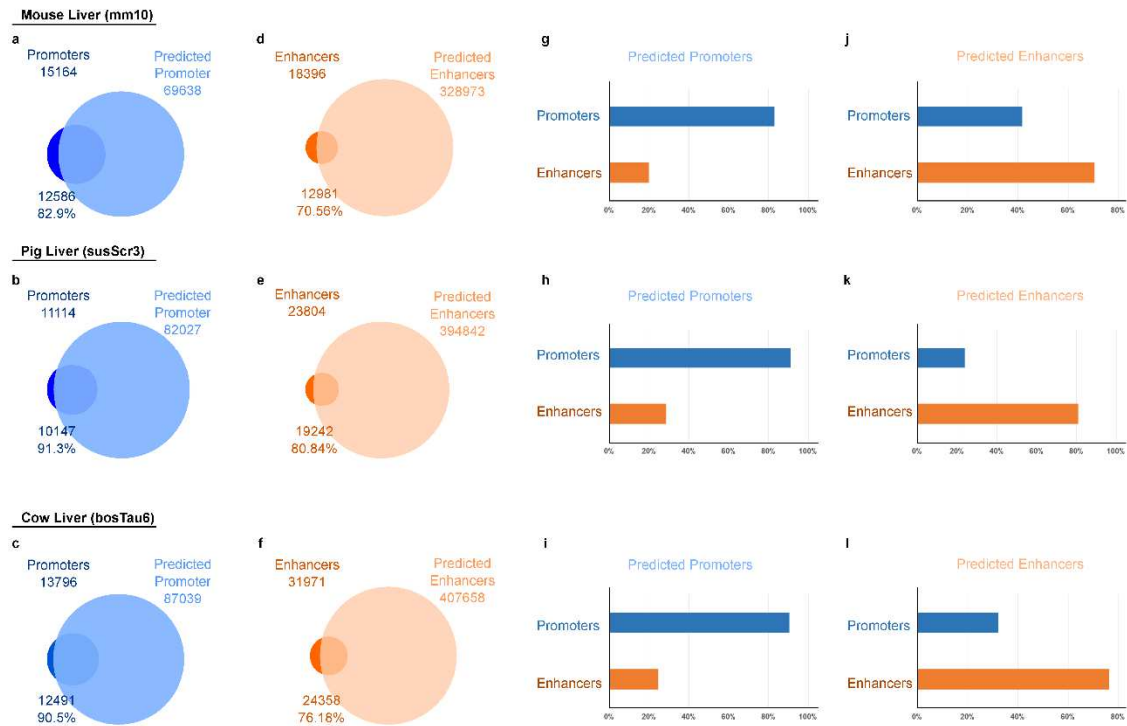

**Supplementary Figure 8 | Robustness in the inference of homologous regions between assemblies using the liftOver UCSC tool <sup>1</sup>.** The comparative approach used in this study employs liftOver genome coordinates conversion. This is based on chain and net files between genome assemblies. Chains refer to ordered sequence of pairwise nucleotide alignments by BLASTZ 2 separated by large gaps. Nets are a higher-order alignments, which track which bases are covered by more than one chain as well as annotating inversions and or other displacements between genome assemblies. Nets are not symmetric, meaning they show the best alignment of one species versus the other with the consequence they can differ in the reciprocal net. To optimise for the best alignment from both species we prepare a “reciprocal best” alignment. It is noteworthy that this method does not allow us to identify lineage-specific duplications. It is important to evaluate if this approach is overly sensitive to the particular combination of species in which it is applied. We therefore tested our liftOver pipeline to convert human Roadmap Epigenomics chromHMM TssA and Enh data into **(a)** mouse (mm10), **(b)** pig (susScr3) and **(c)** cow (bosTau6). The predicted functional elements in each genome were then



assessed for enrichment within species specific experimentally derived H3K4me3 regions (promoters) and enhancers (regions with H3K27ac signal not overlapping H3K4me3 regions)<sup>17</sup>. This revealed that, as in sheep, liftOver of human promoters and enhancers from 127 epigenomes successfully recovered high proportions of mouse, pig and cow functional elements. Next, as a proxy to obtain true positive (TPR) and true negative rate (TNR) estimates in our predictions we present the proportion of experimentally identified liver promoters and enhancers captured by the predicted promoters pipeline across different species **(g)** mouse **(h)** pig and **(i)** cow, and finally, we present as TPR the proportion of experimentally identified liver enhancers in the predicted enhancers pipeline and as TNR the proportion of liver promoters in **(j)** mouse **(k)** pig in **(l)** cow.

**a Universal Set (cell-lines)**

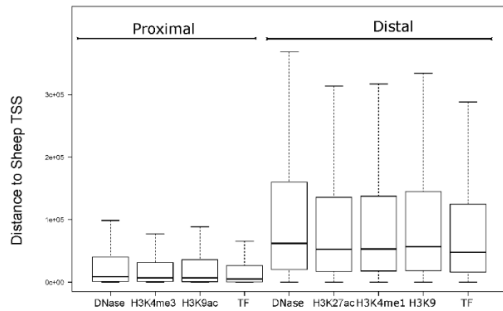

**b**

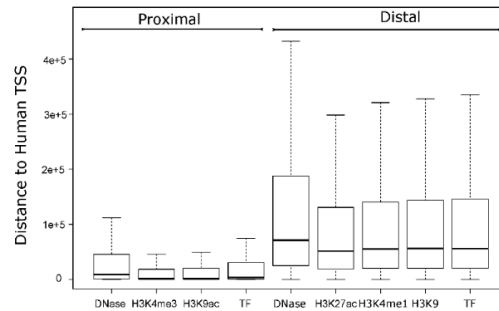

**c ChromHMM set (tissues)**

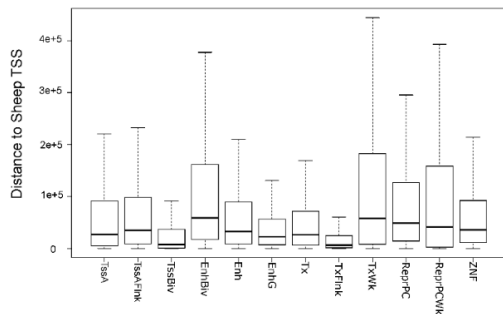

**d**

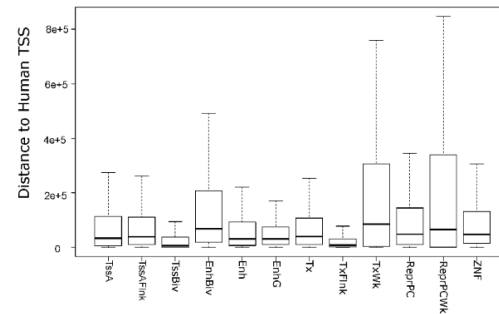

### Supplementary Figure 9 | Physical proximity of predicted genome features to transcription start sites in the human and sheep genomes.

**(a)** The distance to sheep TSS is shown for each of nine genome features predicted from ENCODE data. Predicted proximal features are consistently closer than distal ones. **(b)** Distance to human TSS for each predicted ENCODE genome feature. **(c)** The distance to sheep TSS is shown for each of 12 chromatin states predicted from Roadmap Epigenome data. **(d)** Distance to human TSS for each predicted Roadmap genome feature. Boxplots represent the distance of predicted genome features to TSSs through their quartiles. The bottom and top of the box represents the first and third quartiles. The band in the middle the median or second quartile. The ends of the whiskers represent the lowest datum within 1.5 of the interquartile range of the lower quartile and the highest datum within the 1.5 inter quartile of the upper quartile.

**a** ENCODE cell lines

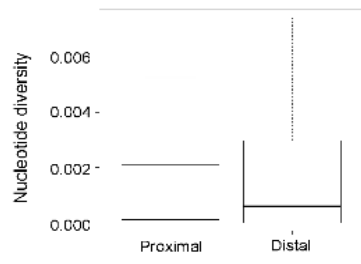

**b**

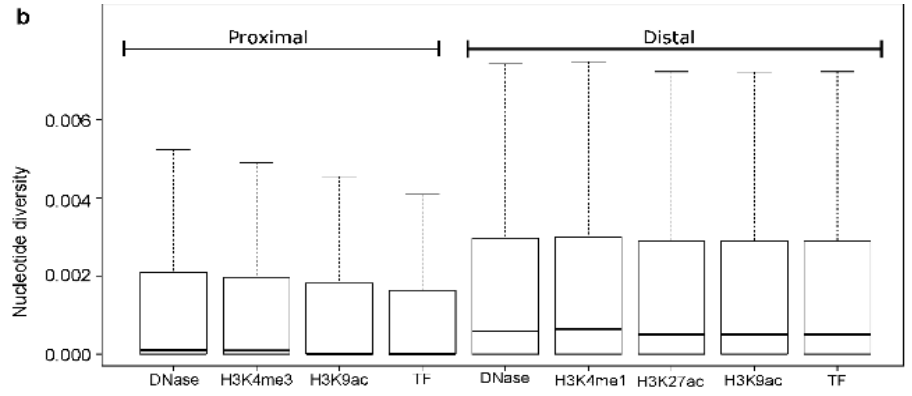

**c** chromHMM features

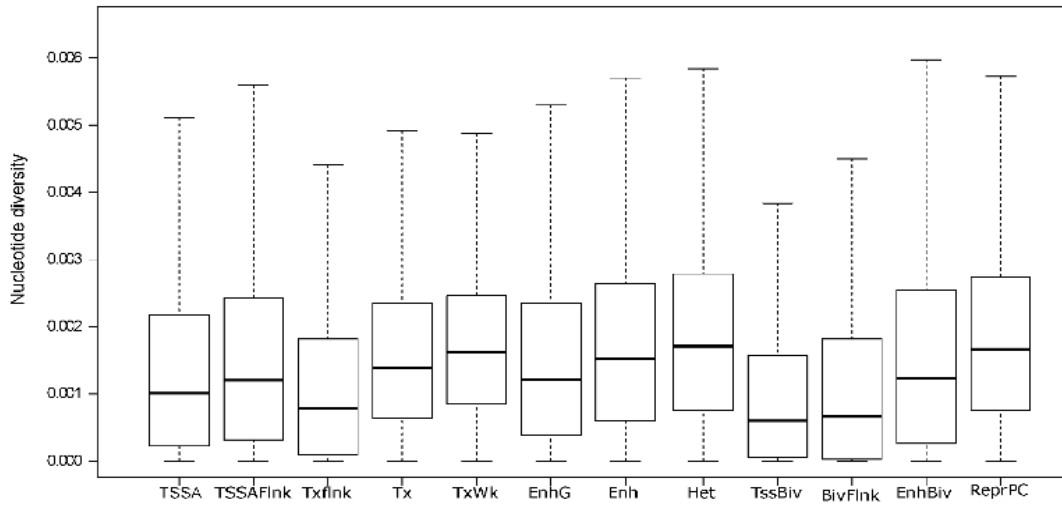

**d** Sheep annotation, sheep ChIP-seq in-house data, chromHMM features, ENCODE cell lines

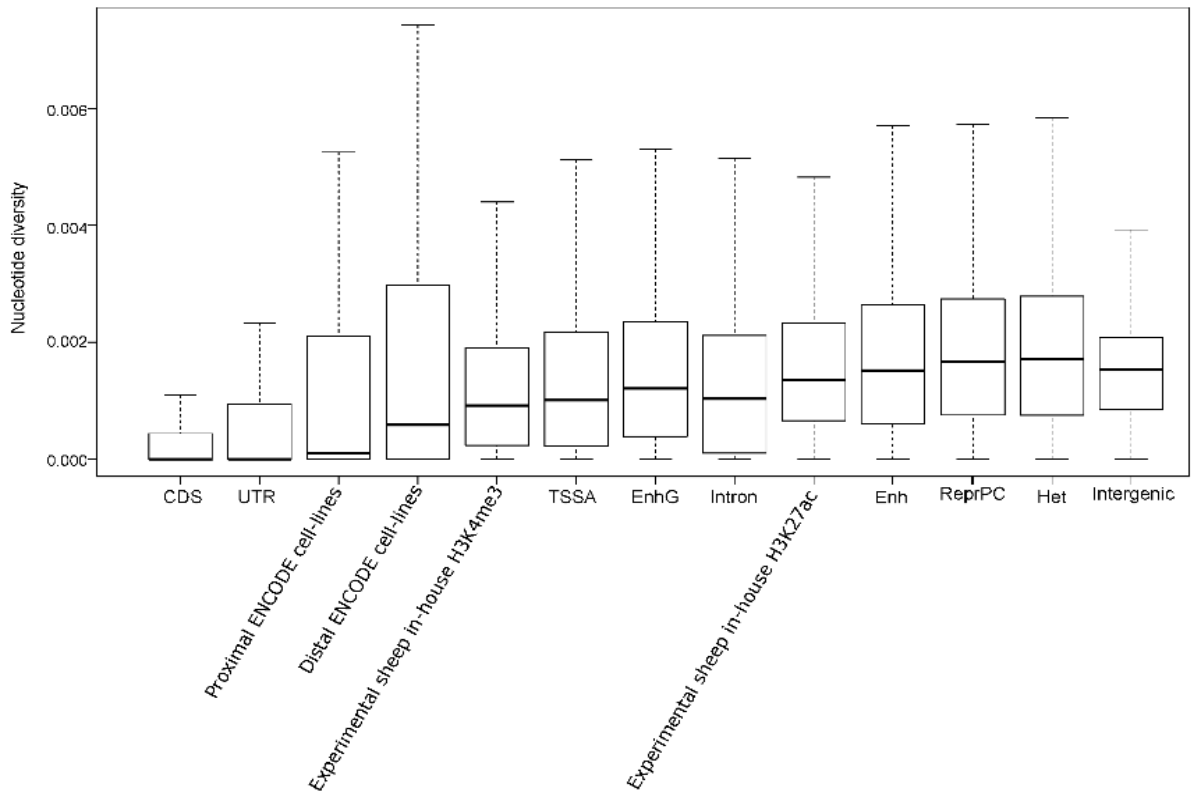

**Supplementary Figure 10 | Nucleotide diversity compared between predicted genome features.** **(a)** Higher nucleotide diversity was observed within distal predicted elements expected to be less evolutionarily constrained than proximal regulatory features. **(b)** Nucleotide diversity is plotted separately for each proximal and distal epigenome mark predicted from the ENCODE dataset. **(c)** Nucleotide diversity is compared across predicted chromatin states from the Roadmap dataset. **(d)** Nucleotide diversity compared across both experimentally derived genome features and from the reference assembly OARv3.1. Boxplots represent the distribution of nucleotide diversity per genome feature through their quartiles. The bottom and top of the box represents the first and third quartiles. The band in the middle the median or second quartile. The ends of the whiskers represent the lowest datum within 1.5 of the interquartile range of the lower quartile and the highest datum within the 1.5 inter quartile of the upper quartile.

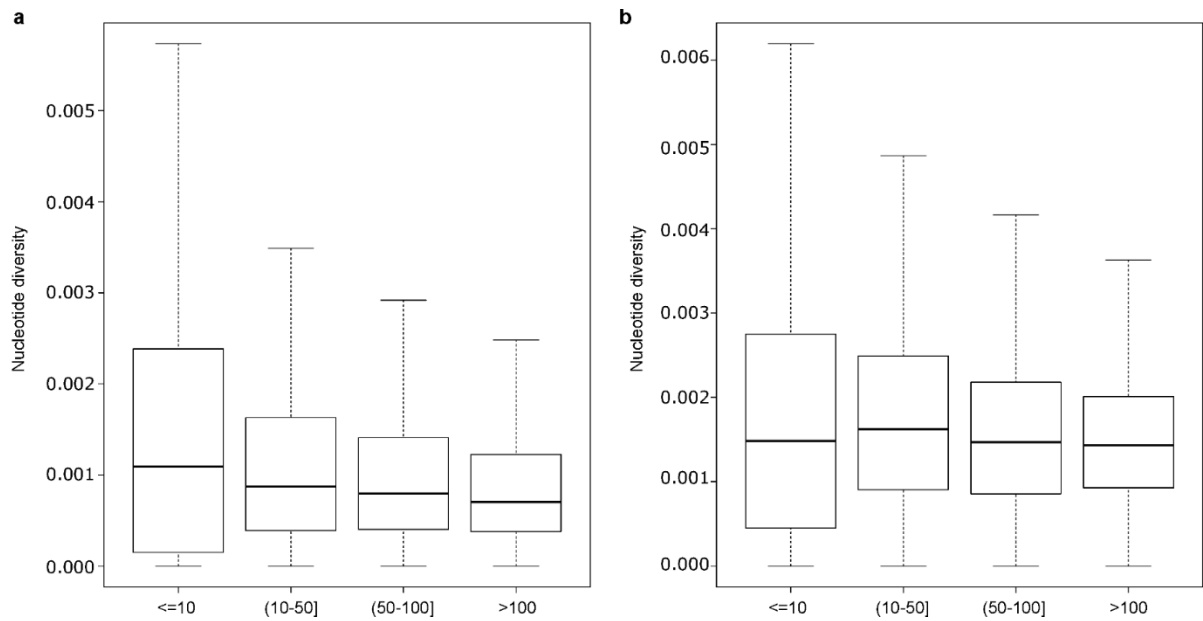

**Supplementary Figure 11 | Decreasing nucleotide diversity in elements ubiquitously active ( $>100$  tissues).** Nucleotide diversity in domestic sheep population for **(a)** TSSAs and **(b)** enhancers detected in different number of tissues. Boxplots represent the distribution of nucleotide diversity per feature through their quartiles. The bottom and top of the box represents the first and third quartiles. The band in the middle the median or second quartile. Finally the ends of the whiskers represent the lowest datum within 1.5 of the interquartile range of the lower quartile and the highest datum within the 1.5 inter quartile of the upper quartile.

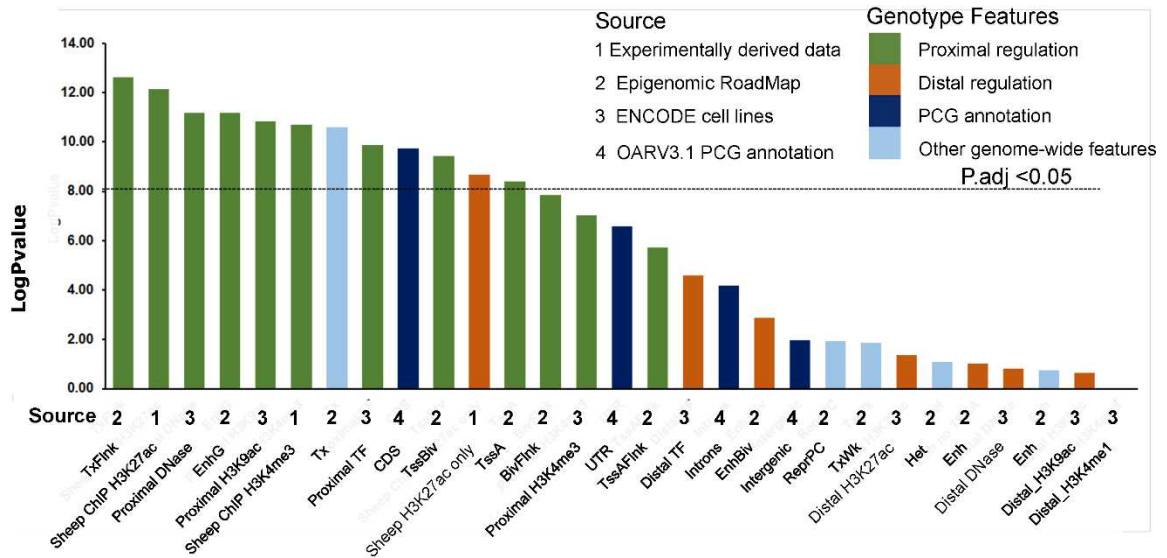

**Supplementary Figure 12 | Strength of genome feature enrichment within 635 sweep regions.**

Overlap between sweep regions and annotated genomic features was performed using LOLA <sup>1</sup>. Genome features originate from four sources (numbered) and can be classified as broadly proximal, distal, describing protein coding genes or other (colour coded). The 12 genome features significantly enriched mainly represent proximal components of the gene regulatory machinery, along with coding exons and sites actively transcribed.

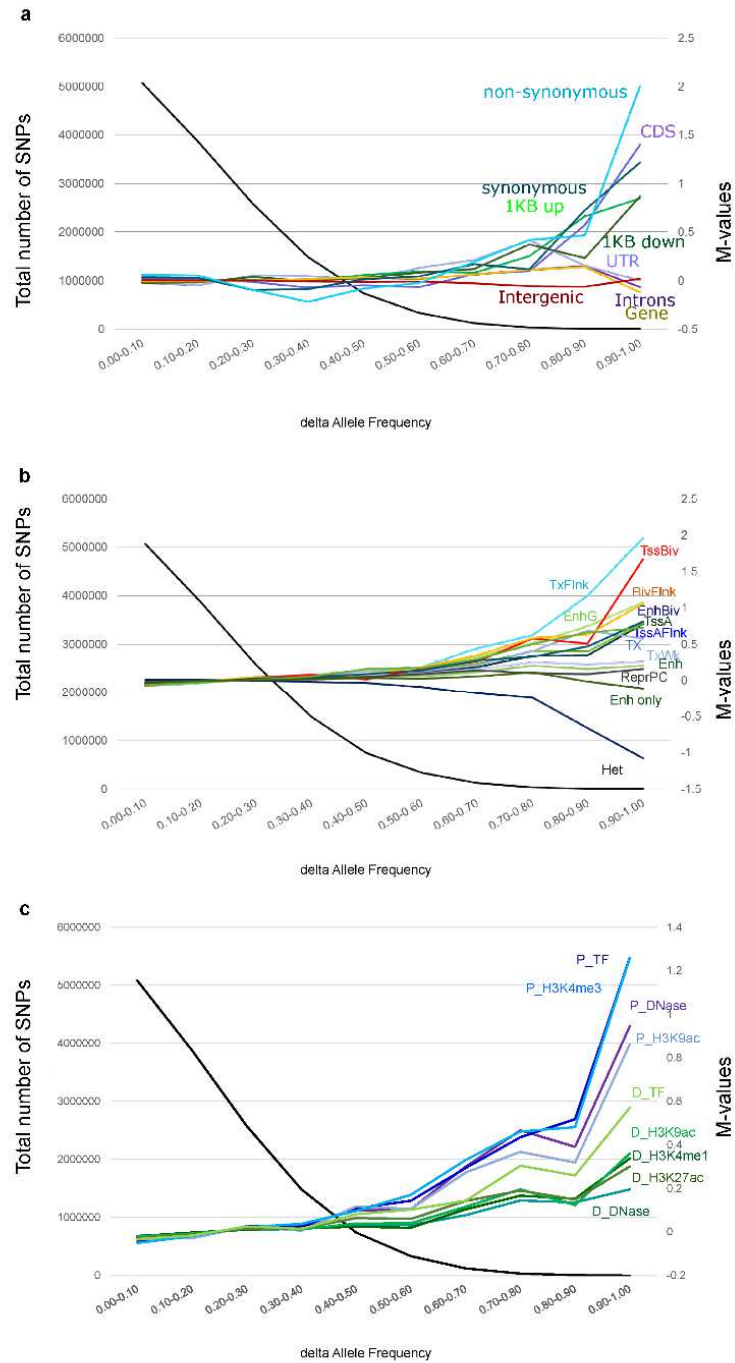

**Supplementary Figure 13 | Delta allele frequency (dAF) for SNPs residing in annotated genome features.** dAF calculated for two populations domestic vs mouflon. The black line represents the total number of SNPs in each dAF bin and coloured lines represent M values of different SNP types. M values were calculated by comparing the frequency of SNPs in a given annotation category in a specific bin with the corresponding frequency across all bins. **(a)** Genomic features based on current sheep annotation (v.1.81) **(b)** chromHMM features translated to sheep coordinates **(c)** ENCODE cell line universal set translated to sheep coordinates.

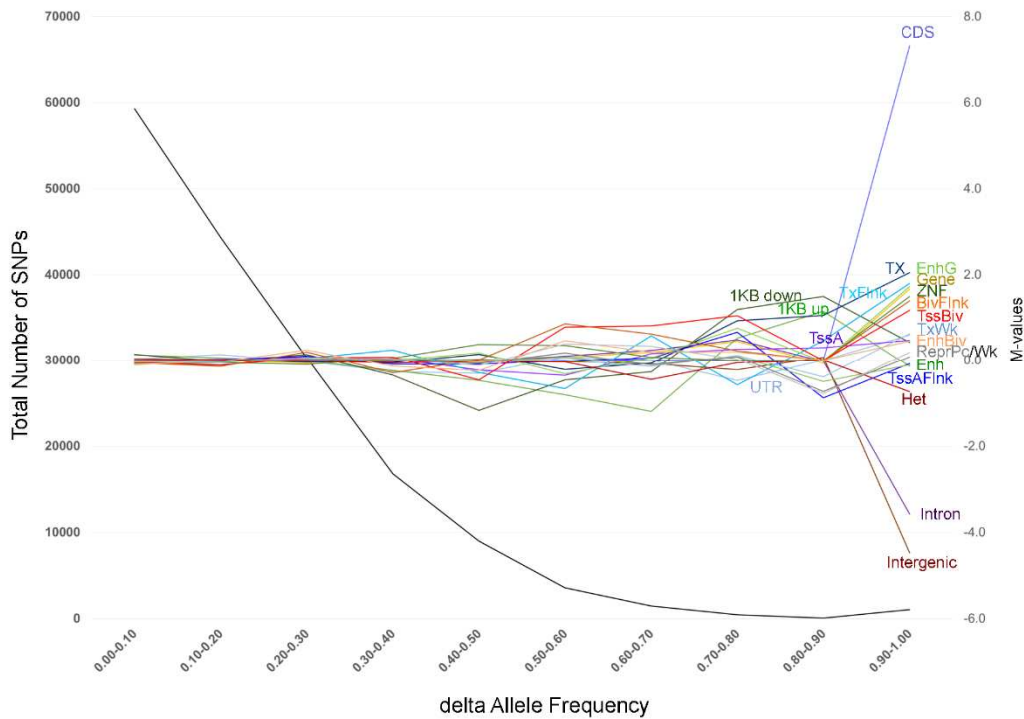

**Supplementary Figure 14 | Allele frequency differences ( $\Delta AF$ ) between wild and domestic sheep following artificial manipulation of exons.** To evaluate correlated effects between annotation features, exonic SNP were artificially altered to take extreme values ( $\Delta AF = 0.95$ , which is in the highest bin) in a random set of 1420 20 Kb bins. The M-value reflects the strength of enrichment beyond expectation (refer to methods) and the black line gives the total number of SNPs in each  $\Delta AF$  bin. Protein coding gene annotations are plotted along with 12 chromatin state annotations from the Roadmap dataset.



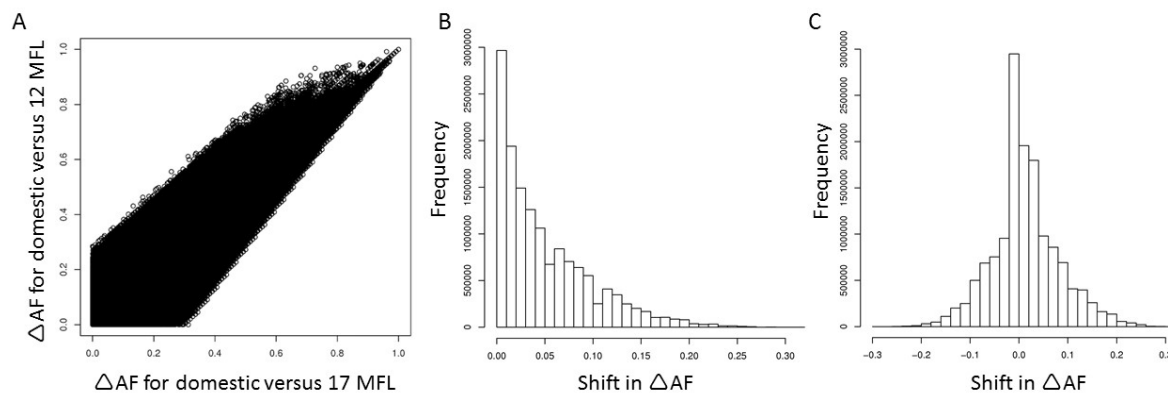

**Supplementary Figure 15 | Allele frequency difference comparison.** The sampling of domestic and wild genomes is likely to have some influence on estimates of diversity and the detection of selection sweeps. We evaluated the impact of reducing the number of Mouflon genomes included in the estimation of observed allele frequency differences. Five Mouflon were selected for removal based on their membership of a population subgroup (Urmia Lake, Supplementary Figure 1) that are likely highly inbred. Allele frequency difference ( $\Delta AF$ ) was assessed as it is the basis for the site frequency testing and relates to selection sweep methodology. The correlation of allele frequencies was high ( $r^2 = 0.96$ ) when estimated using all available Mouflon ( $n = 17$ ) or a reduced number ( $n = 12$ ). **(a)** Allele frequency difference between domestic sheep and mouflon was compared using all Mouflon or the smaller subset ( $r^2 = 0.87$ ). This indicates that the shift in  $\Delta AF$  between species was not large in response to removal of the Mouflon genomes. **(b,c)** The magnitude in  $\Delta AF$  shift is given as histograms, and shows that few loci have values exceeding 0.3. This indicates the use of a reduced representation of Mouflon has a measurable impact that is unlikely to influence the major findings of the study.

**Supplementary Table 1: Distribution of Consequences types across domestic and Mouflon.** 60.1% of the variants are intergenic regions and 30.4% introns.

| <b>Consequence Type</b>            | <b>Counts</b> |
|------------------------------------|---------------|
| splice_acceptor_variant            | 417           |
| splice_donor_variant               | 413           |
| stop_gained                        | 1,211         |
| stop_lost                          | 61            |
| initiator_codon_variant            | 205           |
| missense_variant                   | 84,871        |
| splice_region_variant              | 23,916        |
| stop_retained_variant              | 87            |
| synonymous_variant                 | 133,891       |
| coding_sequence_variant            | 83            |
| mature_miRNA_variant               | 168           |
| 5_prime_UTR_variant                | 9,340         |
| 3_prime_UTR_variant                | 63,868        |
| non_coding_transcript_exon_variant | 7,294         |
| intron_variant                     | 9,196,042     |
| non_coding_transcript_variant      | 7,568         |
| upstream_gene_variant              | 1,261,312     |
| downstream_gene_variant            | 1,250,954     |
| intergenic_variant                 | 17,989,136    |

**Supplementary Table 2: Distribution of Coding Consequences types across domestic and Mouflon sheep**

| <b>Consequence Type</b> | <b>Counts</b> |
|-------------------------|---------------|
| stop_gained             | 1,211         |
| stop_lost               | 61            |
| missense_variant        | 84,871        |
| synonymous_variant      | 133,891       |
| coding_sequence_variant | 83            |

**Supplementary Table 3: Variants Summary statistics per phylo-geographic group and individual**

| <b>Region</b>         | <b>Reference</b> | <b>Het</b> | <b>Alternative</b> | <b>Total</b> |
|-----------------------|------------------|------------|--------------------|--------------|
| <b>Africa</b>         | 21261190         | 3575177    | 2335157            | 27171523     |
| <b>Americas</b>       | 20788745         | 3902309    | 2058070            | 26749124     |
| <b>Asia</b>           | 21087868         | 3408676    | 2368399            | 26864943     |
| <b>Europe</b>         | 21138054         | 3788680    | 2020560            | 26969705     |
| <b>Middle East</b>    | 20974220         | 3788680    | 2180280            | 269431       |
| <b>Mouflon</b>        | 20461963         | 4142895    | 3183907            | 27788764     |
| <b>United Kingdom</b> | 20419443         | 3882973    | 1834499            | 26136915     |

**Supplementary Table 4:** Genes associated with selective sweeps in domestic animals reported in other studies.

| Chr | Start     | End       | Avg rnk<br>Fst & Pi | Pi    | Fst  | Closest<br>Genes | Distance to<br>closest<br>gene | Function                    | Ref      |
|-----|-----------|-----------|---------------------|-------|------|------------------|--------------------------------|-----------------------------|----------|
| 13  | 50310001  | 50650000  | 2                   | 3.56  | 0.53 | <i>PANK2</i>     | 0                              | Neurodegeneration           | 2,3      |
| 3   | 124790001 | 125080000 | 21.5                | 2.80  | 0.35 | <i>KITLG</i>     | 27570                          | Coat colour                 | 4–6      |
| 2   | 184990001 | 185040000 | 42.5                | 1.98  | 0.33 | <i>GLI2</i>      | 139099                         | Growth                      | 7        |
| 1   | 199640001 | 199790000 | 51                  | 1.79  | 0.35 | <i>IGF2BP2</i>   | 0                              | Adiposity                   | 8–10     |
| 4   | 78890001  | 79000000  | 51.5                | 2.44  | 0.31 | <i>GLI3</i>      | 29289                          | Pigmentation                | 11       |
| 17  | 59450001  | 59520000  | 62.5                | 2.32  | 0.30 | <i>TBX3</i>      | 215541                         | Pigmentation                | 12       |
| 9   | 36140001  | 36240000  | 63                  | 1.72  | 0.34 | <i>PLAG1</i>     | 0                              | Fertility, stature          | 13–16    |
| 15  | 21900001  | 22010000  | 70.5                | 1.60  | 0.39 | <i>BCO2</i>      | 0                              | Yellow-fat                  | 17–19    |
| 9   | 13570001  | 13610000  | 82.5                | 1.85  | 0.30 | <i>DGAT1</i>     | 0                              | Milk fat                    | 20,21    |
| 6   | 37420001  | 37510000  | 144                 | 1.56  | 0.29 | <i>LCORL</i>     | 0                              | Weight/height               | 22–25    |
| 3   | 124640001 | 124680000 | 184                 | 1.69  | 0.26 | <i>KITLG</i>     | 0                              | Coat colour                 | 4–6      |
| 8   | 75670001  | 75700000  | 228.5               | 1.97  | 0.24 | <i>ESR1</i>      | 0                              | Litter size; prolifacy      | 26,27    |
| 6   | 38500001  | 38530000  | 245.5               | 1.62  | 0.25 | <i>LCORL</i>     | 1047670                        | Weight/height               | 22–25    |
| 5   | 19460001  | 19480000  | 312.5               | 1.23  | 0.27 | <i>IRF1</i>      | 5040                           | Immune function             | 28,29    |
| 3   | 129730001 | 129750000 | 359                 | 0.94  | 0.31 | <i>SOCS2</i>     | 7494                           | Weight and milk production  | 30       |
| 1   | 100990001 | 101010000 | 383.5               | 1.26  | 0.24 | <i>TCHH</i>      | 0                              | Hair                        | 31,32    |
| 4   | 78800001  | 78820000  | 386.5               | 1.15  | 0.26 | <i>GLI3</i>      | 209289                         | pigmentation                | 11       |
| 5   | 85880001  | 85900000  | 405                 | 1.11  | 0.26 | <i>MEF2C</i>     | 173852                         | Skeletal muscle development | 28,33,34 |
| 2   | 105830001 | 105850000 | 417.5               | 1.27  | 0.23 | <i>HAND2</i>     | 235173                         | Limb development            | 35       |
| 20  | 17530001  | 17550000  | 434.5               | 1.207 | 0.24 | <i>VEGFA</i>     | 147890                         | Reproduction                | 36,37    |
| 13  | 63380001  | 63400000  | 469                 | 1.237 | 0.22 | <i>ITCH</i>      | 0                              | Coat colour                 | 38       |
| 1   | 203460001 | 203480000 | 481                 | 0.977 | 0.25 | <i>SOX2</i>      | 52282                          | Stem cell maintenance       | 39       |
| 6   | 35290001  | 35310000  | 486.5               | 1.05  | 0.24 | <i>GPRIN3</i>    | 201294                         | Brain development           | 40       |
| 6   | 70290001  | 70310000  | 492.5               | 1.24  | 0.21 | <i>KIT</i>       | 55390                          | Coat colour                 | 41,42    |

**Supplementary Table 5: Summary statistics on regulatory regions from the ROADMAP dataset, universal set (cell lines) and chromHMM features (human 127 tissues epigenomes) reciprocal liftOver to sheep genome (minMatch=0.1) oarv3.1.**

| chromHMM                     |          | Human      |                   |            |            |                | Sheep            |            |          |            |           |                |
|------------------------------|----------|------------|-------------------|------------|------------|----------------|------------------|------------|----------|------------|-----------|----------------|
|                              |          | # Features | # Merged Features | Average bp | Total bp   | % human genome | # Features sheep | % Recovery | # Merged | Average bp | Total bp  | % Sheep genome |
| Active TSS                   | TSSA     | 2525249    | 146860            | 1053       | 154645000  | 4.93           | 1036207          | 41.03      | 82792    | 995        | 82359149  | 3.18           |
| Flanking active TSS          | TSSAFlnk | 3652921    | 294595            | 935        | 275342400  | 8.78           | 1773713          | 48.56      | 183766   | 816        | 149940350 | 5.79           |
| Transcribed at 5' and 3' UTR | TxFlnk   | 277589     | 61004             | 1183       | 72138400   | 2.30           | 111873           | 40.30      | 34251    | 936        | 32067982  | 1.24           |
| Strong Transcription         | Tx       | 3883996    | 94165             | 6101       | 574463800  | 18.31          | 721092           | 18.57      | 89599    | 2526       | 226333266 | 8.75           |
| Weak Transcription           | TxWk     | 10396279   | 127882            | 15776      | 2017410200 | 64.31          | 1914957          | 18.42      | 201299   | 3580       | 720684948 | 27.85          |
| Genic Enhancers              | EnhG     | 1302269    | 157928            | 1829       | 288851800  | 9.21           | 464496           | 35.67      | 100036   | 1211       | 121183647 | 4.68           |
| Enhancers                    | Enh      | 11214553   | 553599            | 2234       | 1236774800 | 39.42          | 4384817          | 39.10      | 415857   | 1413       | 587677260 | 22.71          |
| Heterochromatin              | Het      | 4071861    | 232924            | 5257       | 1224371800 | 39.03          | 289704           | 7.11       | 119185   | 1449       | 172657767 | 6.67           |
| Bivalent /Poised Enhancers   | TssBiv   | 496055     | 45889             | 1071       | 49154400   | 1.57           | 223409           | 45.04      | 27773    | 1022       | 28391816  | 1.10           |
| Flanking Bivalent TSS /Enh   | BivFlnk  | 649112     | 59187             | 704        | 41680400   | 1.33           | 327143           | 50.40      | 37351    | 670        | 25012932  | 0.97           |
| Bivalent Enhancer            | EnhBiv   | 1101156    | 165361            | 896        | 148152400  | 4.72           | 548188           | 49.78      | 98442    | 786        | 77370235  | 2.99           |

|                    |        |         |         |      |           |       |         |       |         |      |           |      |
|--------------------|--------|---------|---------|------|-----------|-------|---------|-------|---------|------|-----------|------|
| Repressed Polycomb | ReprPC | 2434414 | 199871  | 3339 | 667283800 | 21.27 | 753572  | 30.95 | 119952  | 1881 | 225672647 | 8.72 |
| Universal set      |        |         |         |      |           |       |         |       |         |      |           |      |
| Proximal_DNase     |        | 607894  | 607894  | 150  | 91358400  | 2.91  | 347343  | 57.14 | 341731  | 156  | 53394400  | 2.06 |
| Proximal_H3K4me3   |        | 4256692 | 420127  | 150  | 63159010  | 2.01  | 1810021 | 42.52 | 166587  | 156  | 25926035  | 1.00 |
| Proximal_H3K9ac    |        | 1413622 | 326690  | 150  | 49118460  | 1.57  | 863085  | 61.05 | 193180  | 156  | 30047479  | 1.16 |
| Proximal_TF        |        | 384343  | 384343  | 150  | 57786950  | 1.84  | 147963  | 38.50 | 145993  | 156  | 22717165  | 0.88 |
| Distal_DNase       |        | 2558595 | 2558595 | 150  | 384123670 | 12.24 | 1397839 | 54.63 | 1373967 | 159  | 217776308 | 8.42 |
| Distal_H3K27ac     |        | 3557364 | 1126338 | 150  | 169123020 | 5.39  | 2156448 | 60.62 | 632067  | 158  | 99748144  | 3.85 |
| Distal_H3K4me1     |        | 5675289 | 1516873 | 150  | 227752370 | 7.26  | 1634217 | 28.80 | 374953  | 158  | 59207183  | 2.29 |
| Distal_H3K9ac      |        | 2083470 | 944139  | 150  | 141772490 | 4.52  | 1283569 | 61.61 | 550604  | 158  | 86765982  | 3.35 |
| Distal_TF          |        | 1122364 | 1122364 | 150  | 168531380 | 5.37  | 367515  | 32.74 | 361496  | 158  | 57180633  | 2.21 |

**Supplementary Table 6: Results on testing the significant overlap between annotated genomic features and ovine adipose tissue histone modification marks compared to 1000 genome-wide randomizations per feature.**

| Genomic Features    | # Original features | Original overlap sheep H3K27ac | Average overlap sheep H3K27ac in permutations | #times bigger than original in |
|---------------------|---------------------|--------------------------------|-----------------------------------------------|--------------------------------|
| <b>H3K27ac</b>      |                     |                                |                                               |                                |
| TssA                | 82792               | 15760                          | 6376                                          | 0                              |
| TssAFlnk            | 183766              | 22579                          | 12267                                         | 0                              |
| TxFlnk              | 34251               | 7805                           | 2765                                          | 0                              |
| Tx                  | 89599               | 11987                          | 8688                                          | 0                              |
| TxWk                | 201299              | 76039                          | 46461                                         | 0                              |
| EnhG                | 100036              | 12618                          | 7853                                          | 0                              |
| Enh                 | 415857              | 70793                          | 43829                                         | 0                              |
| Enh only            | 346131              | 21891                          | 20808                                         | 0                              |
| Het                 | 119185              | 6440                           | 9538                                          | 1000                           |
| TssBiv              | 27773               | 6672                           | 2291                                          | 0                              |
| BivFlnk             | 37351               | 6089                           | 2870                                          | 0                              |
| EnhBiv              | 98442               | 8582                           | 7179                                          | 0                              |
| ReprPC              | 119952              | 10373                          | 10280                                         | 128                            |
| <b>H3K4me3</b>      |                     |                                |                                               |                                |
| Proximal_DNase      | 341731              | 12803                          | 5640                                          | 0                              |
| Proximal_H3K4me3    | 166587              | 8726                           | 3131.35                                       | 0                              |
| Proximal_H3K9ac     | 193180              | 12326                          | 3558.45                                       | 0                              |
| Proximal_TF         | 145993              | 12164                          | 2790.99                                       | 0                              |
| <b>H3K27ac only</b> |                     |                                |                                               |                                |
| Distal_DNase        | 1373967             | 22871                          | 23939.1                                       | 0                              |
| Distal_H3K27ac      | 632067              | 19321                          | 18123                                         | 0                              |
| Distal_H3K4me1      | 374953              | 8972                           | 13468.9                                       | 0                              |
| Distal_H3K9         | 550604              | 18453                          | 16892.9                                       | 0                              |
| Distal_TF           | 361496              | 15427                          | 13159.7                                       | 0                              |
| <b>H3K27me3</b>     |                     |                                |                                               |                                |
| TssA_no_TssBiv      | 82792               | 2628                           | 3412                                          | 1000                           |
| TssAFlnk_no_TssBiv  | 183766              | 5031                           | 7728                                          | 1000                           |
| TxFlnk              | 34251               | 1939                           | 2012                                          | 951                            |
| Tx                  | 89599               | 2615                           | 6677                                          | 1000                           |
| TxWk                | 201299              | 12651                          | 16657                                         | 1000                           |
| EnhG                | 100036              | 2469                           | 5788                                          | 1000                           |
| Enh                 | 415857              | 16557                          | 21304                                         | 1000                           |
| Enh only            | 346131              | 11187                          | 15720                                         | 1000                           |
| Het                 | 119185              | 7236                           | 7104                                          | 38                             |
| TssBiv              | 27773               | 6820                           | 1675                                          | 0                              |
| BivFlnk             | 37351               | 6916                           | 2061.52                                       | 0                              |
| EnhBiv              | 98442               | 10739                          | 5194                                          | 0                              |
| ReprPC              | 119952              | 14388                          | 7777                                          | 0                              |



**Supplementary Table 7: Results on testing the significant overlap between annotated genomic features from human Epigenomics Roadmap ,TssA and Enh into mouse (mm10), pig (susScr3) and cow (bosTau6) genome annotations and each species specific H3K27ac regions from public dataset**  
<sup>43</sup> E-MTAB-2633.

| Genomic Features       | # Original features | Original overlap species H3K27ac | Average overlap sheep H3K27ac in permutations | #times bigger than original in |
|------------------------|---------------------|----------------------------------|-----------------------------------------------|--------------------------------|
| <b>H3K27ac mm10</b>    |                     |                                  |                                               |                                |
| TssA                   | 69638               | 14338                            | 3128                                          | 0                              |
| Enh                    | 328973              | 18428                            | 14323                                         | 0                              |
| <b>H3K27ac susScr3</b> |                     |                                  |                                               |                                |
| TssA                   | 82027               | 16212                            | 4431                                          | 0                              |
| Enh                    | 394842              | 24539                            | 19372                                         | 0                              |
| <b>H3K27ac bosTau6</b> |                     |                                  |                                               |                                |
| TssA                   | 87039               | 20378                            | 4902                                          | 0                              |
| Enh                    | 407658              | 29165                            | 23940                                         | 0                              |

**Supplementary Table 8: Overlap of domestic selective sweeps (1420 regions of 20 kb) regions and list of annotated genomic features based on LOLA <sup>1</sup>.**

| Genomic Feature         | Log p-val | Log Odd ratio | support | Rnk V | Rnk LO | Rnk Sup | Max Rnk | Mean Rnk | b      | c    | d      | Size   |
|-------------------------|-----------|---------------|---------|-------|--------|---------|---------|----------|--------|------|--------|--------|
| EnhG                    | 12.83     | 1.50          | 552     | 2     | 3      | 21      | 21      | 8.67     | 72240  | 868  | 170678 | 100036 |
| Tx                      | 10.68     | 1.44          | 573     | 4     | 6      | 19      | 19      | 9.67     | 77654  | 847  | 165264 | 89599  |
| TxFlnk                  | 8.03      | 1.48          | 280     | 5     | 4      | 46      | 46      | 18.3     | 34521  | 1140 | 208397 | 34251  |
| 10KB Upstream           | 6.28      | 1.37          | 340     | 6     | 10     | 39      | 39      | 18.3     | 45387  | 1080 | 197531 | 20921  |
| 10KB Downstream         | 4.92      | 1.33          | 310     | 7     | 12     | 44      | 44      | 21       | 42285  | 1110 | 200633 | 20921  |
| 1KB Upstream            | 4.89      | 1.35          | 258     | 8     | 11     | 47      | 47      | 22       | 34254  | 1162 | 208664 | 20921  |
| Sheep ChiP H3K27ac      | 4.60      | 1.27          | 429     | 11    | 15     | 33      | 33      | 19.7     | 61683  | 991  | 181235 | 35266  |
| CDS                     | 4.40      | 1.25          | 533     | 12    | 16     | 27      | 27      | 18.3     | 79000  | 887  | 163918 | 226211 |
| 1KB Dowsntream          | 3.83      | 1.31          | 237     | 15    | 13     | 50      | 50      | 26       | 32272  | 1183 | 210646 | 20921  |
| Proximal DNase          | 3.49      | 1.21          | 549     | 16    | 20     | 23      | 23      | 19.7     | 83275  | 871  | 159643 | 341731 |
| Proximal All            | 3.41      | 1.20          | 550     | 17    | 21     | 22      | 22      | 20       | 83589  | 870  | 159329 | 346880 |
| Sheep ChiP H3K4me3      | 3.35      | 1.30          | 204     | 18    | 14     | 55      | 55      | 29       | 27758  | 1216 | 215160 | 16098  |
| Proximal TF             | 3.07      | 1.21          | 395     | 19    | 19     | 37      | 37      | 25       | 58686  | 1025 | 184232 | 145993 |
| Proximal H3K9ac         | 2.66      | 1.18          | 438     | 20    | 24     | 32      | 32      | 25.3     | 66546  | 982  | 176372 | 193180 |
| Sheep H3K27ac enhancers | 2.42      | 1.19          | 326     | 21    | 23     | 42      | 42      | 28.7     | 48669  | 1094 | 194249 | 26492  |
| TssBiv                  | 2.22      | 1.20          | 242     | 23    | 22     | 49      | 49      | 31.3     | 35473  | 1178 | 207445 | 27773  |
| Introns                 | 1.76      | 1.12          | 612     | 25    | 31     | 17      | 31      | 24.3     | 97893  | 808  | 145025 | 187359 |
| BivFlnk                 | 1.65      | 1.15          | 253     | 26    | 27     | 48      | 48      | 33.7     | 38398  | 1167 | 204520 | 37351  |
| TssAFlnk                | 1.09      | 1.08          | 830     | 32    | 33     | 11      | 33      | 25.3     | 137440 | 590  | 105478 | 183766 |
| Intergenic              | 0.88      | 1.08          | 1101    | 34    | 34     | 6       | 34      | 24.7     | 185187 | 319  | 57731  | 22091  |
| UTR                     | 0.78      | 1.10          | 121     | 35    | 32     | 59      | 59      | 42       | 18938  | 1299 | 223980 | 14174  |
| Proximal H3K4me3        | 0.76      | 1.06          | 304     | 36    | 36     | 45      | 45      | 39       | 49492  | 1116 | 193426 | 166587 |
| TssA                    | 0.33      | 1.01          | 571     | 40    | 40     | 20      | 40      | 33.3     | 97377  | 849  | 145541 | 82792  |
| Distal TF               | 0.28      | 1.00          | 992     | 42    | 42     | 10      | 42      | 31.3     | 169824 | 428  | 73094  | 361496 |
| EnhBiv                  | 0.05      | 0.93          | 412     | 46    | 46     | 35      | 46      | 42.3     | 73993  | 1008 | 168925 | 98442  |
| TxWk                    | 0.05      | 0.93          | 1025    | 47    | 47     | 9       | 47      | 34.3     | 178784 | 395  | 64134  | 201299 |
| Distal H3K27ac          | 0.002058  | 0.85          | 1091    | 52    | 52     | 7       | 52      | 37       | 193405 | 329  | 49513  | 632067 |
| Enh no TSSA             | 0.0003780 | 0.80          | 1172    | 53    | 54     | 4       | 54      | 37       | 207708 | 248  | 35210  | 346131 |
| Enh                     | 0.0002924 | 0.78          | 1213    | 55    | 58     | 3       | 58      | 38.7     | 214300 | 207  | 28618  | 415857 |
| ReprPC                  | 0.0000954 | 0.83          | 533     | 56    | 53     | 27      | 56      | 45.3     | 102255 | 887  | 140663 | 119952 |
| Distal H3K9             | 0.0000166 | 0.79          | 1235    | 29    | 30     | 4       | 30      | 21       | 216964 | 185  | 25954  | 361914 |
| Distal H3K4me1          | 0.0000005 | 0.77          | 572     | 30    | 29     | 17      | 30      | 25.3     | 110238 | 848  | 132680 | 110609 |
| Distal DNase            | 0.00      | 0.59          | 1043    | 31    | 31     | 8       | 31      | 23.3     | 189175 | 377  | 53743  | 550604 |
| Distal_All              | 0.00      | 0.58          | 444     | 32    | 32     | 24      | 32      | 29.3     | 90465  | 976  | 152453 | 374953 |
| Het                     | 0.00      | 0.62          | 1311    | 33    | 37     | 1       | 37      | 23.7     | 232361 | 109  | 10557  | 18348  |

**Supplementary Table 9: Overlap of (1420 random regions of 20 kb) regions and list of annotated genomic features based on LOLA <sup>1</sup>.**

| Genomic Feature              | Log p-val | Log Odd ratio | support | Rnk V | Rnk LO | Rnk Sup | Max Rnk | Mean Rnk | b      | c    | d      | Size    |
|------------------------------|-----------|---------------|---------|-------|--------|---------|---------|----------|--------|------|--------|---------|
| UTR                          | 1.06      | 1.14          | 125     | 1     | 2      | 59      | 59      | 20.7     | 18934  | 1294 | 223985 | 14174   |
| Distal H3K9ac                | 0.99      | 1.09          | 1125    | 2     | 4      | 7       | 7       | 4.33     | 189093 | 294  | 53826  | 550604  |
| Distal H3K27ac               | 0.98      | 1.09          | 1149    | 3     | 3      | 6       | 6       | 4        | 193347 | 270  | 49572  | 632067  |
| Distal H3K4me1               | 0.78      | 1.06          | 546     | 4     | 7      | 22      | 22      | 11       | 90363  | 873  | 152556 | 374953  |
| BivFlnk                      | 0.68      | 1.06          | 236     | 5     | 6      | 46      | 46      | 19       | 38415  | 1183 | 204504 | 37351   |
| 1KB_upstream                 | 0.66      | 1.06          | 211     | 6     | 5      | 48      | 48      | 19.7     | 34301  | 1208 | 208618 | 20921   |
| CDS                          | 0.54      | 1.03          | 472     | 8     | 10     | 25      | 25      | 14.3     | 79061  | 947  | 163858 | 226211  |
| TssBiv                       | 0.49      | 1.04          | 214     | 10    | 9      | 47      | 47      | 22       | 35501  | 1205 | 207418 | 27773   |
| Sheep CHIP H3K4me3           | 0.44      | 1.03          | 167     | 11    | 11     | 55      | 55      | 25.7     | 27795  | 1252 | 215124 | 16098   |
| 10KB_upstream                | 0.44      | 1.03          | 271     | 13    | 13     | 43      | 43      | 23       | 45456  | 1148 | 197463 | 20921   |
| TxFlnk                       | 0.44      | 1.03          | 207     | 14    | 12     | 49      | 49      | 25       | 34594  | 1212 | 208325 | 34251   |
| TssAFlnk                     | 0.37      | 1.01          | 807     | 16    | 19     | 13      | 19      | 16       | 137463 | 612  | 105456 | 183766  |
| Intergenic                   | 0.36      | 1.01          | 1085    | 17    | 17     | 8       | 17      | 14       | 185203 | 334  | 57716  | 22091   |
| Introns                      | 0.35      | 1.01          | 575     | 18    | 20     | 19      | 20      | 19       | 97930  | 844  | 144989 | 187359  |
| 10KB_downstream              | 0.33      | 1.01          | 249     | 19    | 22     | 45      | 45      | 28.7     | 42346  | 1170 | 200573 | 20921   |
| Distal TF                    | 0.33      | 1.01          | 994     | 20    | 24     | 10      | 24      | 18       | 169822 | 425  | 73097  | 361496  |
| EnhBiv                       | 0.31      | 1.00          | 433     | 25    | 25     | 29      | 29      | 26.3     | 73972  | 986  | 168947 | 98442   |
| Tx                           | 0.19      | 0.98          | 448     | 35    | 33     | 28      | 35      | 32       | 77779  | 971  | 165140 | 89599   |
| ReprPC                       | 0.15      | 0.97          | 587     | 39    | 36     | 18      | 39      | 31       | 102201 | 832  | 140718 | 119952  |
| TxWk                         | 0.14      | 0.97          | 1035    | 40    | 39     | 9       | 40      | 29.3     | 178774 | 384  | 64145  | 201299  |
| 1KB_downstream               | 0.13      | 0.95          | 181     | 41    | 45     | 54      | 54      | 46.7     | 32328  | 1238 | 210591 | 20921   |
| Enh only                     | 0.08      | 0.93          | 1201    | 48    | 50     | 4       | 50      | 34       | 207679 | 218  | 35240  | 346131  |
| Proximal H3K4me3             | 0.08      | 0.94          | 275     | 50    | 49     | 42      | 50      | 47       | 49521  | 1144 | 193398 | 166587  |
| TssA                         | 0.08      | 0.95          | 551     | 51    | 47     | 21      | 51      | 39.7     | 97397  | 868  | 145522 | 82792   |
| Het                          | 0.09      | 0.95          | 743     | 47    | 42     | 14      | 47      | 34.3     | 130010 | 676  | 112909 | 119185  |
| Distal DNase                 | 0.08      | 0.91          | 1322    | 52    | 61     | 2       | 61      | 38.3     | 227790 | 97   | 15129  | 1373967 |
| EnhG                         | 0.07      | 0.94          | 406     | 53    | 48     | 32      | 53      | 44.3     | 72386  | 1013 | 170533 | 100036  |
| Distal All                   | 0.07      | 0.90          | 1324    | 54    | 62     | 1       | 62      | 39       | 228129 | 95   | 14790  | 1397221 |
| Sheep CHIP H3K27ac enhancers | 0.06      | 0.93          | 268     | 55    | 56     | 44      | 56      | 51.7     | 48727  | 1151 | 194192 | 26492   |
| Enh                          | 0.06      | 0.91          | 1238    | 56    | 58     | 3       | 58      | 39       | 214275 | 181  | 28644  | 415857  |
| Proximal All                 | 0.05      | 0.93          | 467     | 57    | 52     | 26      | 57      | 45       | 83672  | 952  | 159247 | 346880  |
| Proximal Dnase               | 0.04      | 0.93          | 464     | 58    | 55     | 27      | 58      | 46.7     | 83360  | 955  | 159559 | 341731  |
| Sheep CHIP H3K27ac           | 0.03      | 0.91          | 336     | 62    | 60     | 38      | 62      | 53.3     | 61776  | 1083 | 181143 | 35266   |
| Proximal H3K9ac              | 0.01      | 0.90          | 359     | 64    | 63     | 36      | 64      | 54.3     | 66625  | 1060 | 176294 | 193180  |
| Proximal TF                  | 0.01      | 0.88          | 311     | 65    | 64     | 41      | 65      | 56.7     | 58770  | 1108 | 184149 | 145993  |

**Supplementary Table 10: Overlap of domestic selective sweeps (635 merged regions) and list of annotated genomic features based on LOLA <sup>1</sup>.**

| Genomic Feature              | Log p-val | Log Odd ratio | support | Rnk V | Rnk LO | Rnk Sup | Max Rnk | Mean Rnk | b      | c   | d      | Size    |
|------------------------------|-----------|---------------|---------|-------|--------|---------|---------|----------|--------|-----|--------|---------|
| 1KB_upstream                 | 13.25     | 2.07          | 161     | 1     | 4      | 46      | 46      | 17       | 34351  | 474 | 209352 | 20921   |
| 1KB_downstream               | 12.82     | 2.07          | 153     | 2     | 3      | 49      | 49      | 18       | 32356  | 482 | 211347 | 20921   |
| TxFlnk                       | 12.63     | 2.03          | 160     | 3     | 5      | 47      | 47      | 18.3     | 34641  | 475 | 209062 | 34251   |
| Sheep CHIP H3K27ac           | 12.16     | 1.82          | 243     | 4     | 16     | 32      | 32      | 17.3     | 61869  | 392 | 181834 | 35266   |
| 10KB upstream                | 11.77     | 1.89          | 192     | 6     | 11     | 41      | 41      | 19.3     | 45535  | 443 | 198168 | 20921   |
| Proximal All                 | 11.21     | 1.73          | 302     | 7     | 25     | 21      | 25      | 17.7     | 83837  | 333 | 159866 | 346880  |
| Proximal DNase               | 11.17     | 1.73          | 301     | 8     | 27     | 22      | 27      | 19       | 83523  | 334 | 160180 | 341731  |
| EnhG_original                | 11.17     | 1.75          | 270     | 9     | 22     | 28      | 28      | 19.7     | 72522  | 365 | 171181 | 100036  |
| Proximal H3K9ac              | 10.83     | 1.74          | 252     | 10    | 23     | 30      | 30      | 21       | 66732  | 383 | 176971 | 193180  |
| Sheep CHIP H3K4me3           | 10.70     | 2.02          | 131     | 12    | 6      | 55      | 55      | 24.3     | 27831  | 504 | 215872 | 16098   |
| Tx                           | 10.60     | 1.71          | 283     | 13    | 30     | 26      | 30      | 23       | 77944  | 352 | 165759 | 89599   |
| Proximal TF                  | 9.87      | 1.72          | 225     | 15    | 28     | 36      | 36      | 26.3     | 58856  | 410 | 184847 | 145993  |
| 10KB downstream              | 9.80      | 1.81          | 175     | 16    | 18     | 45      | 45      | 26.3     | 42420  | 460 | 201283 | 20921   |
| CDS                          | 9.75      | 1.67          | 283     | 17    | 32     | 26      | 32      | 25       | 79250  | 352 | 164453 | 226211  |
| TssBiv                       | 9.44      | 1.84          | 152     | 18    | 14     | 50      | 50      | 27.3     | 35563  | 483 | 208140 | 27773   |
| Sheep CHIP H3K27ac enhancers | 8.67      | 1.71          | 190     | 25    | 31     | 42      | 42      | 32.7     | 48805  | 445 | 194898 | 26492   |
| TssA                         | 8.41      | 1.59          | 327     | 26    | 37     | 18      | 37      | 27       | 97621  | 308 | 146082 | 82792   |
| BivFlnk                      | 7.85      | 1.72          | 155     | 28    | 29     | 48      | 48      | 35       | 38496  | 480 | 205207 | 37351   |
| Proximal H3K4me3             | 7.01      | 1.61          | 185     | 30    | 36     | 44      | 44      | 36.7     | 49611  | 450 | 194092 | 166587  |
| UTR                          | 6.58      | 1.88          | 87      | 31    | 12     | 58      | 58      | 33.7     | 18972  | 548 | 224731 | 14174   |
| TssAFlnk                     | 5.74      | 1.47          | 417     | 36    | 41     | 11      | 41      | 29.3     | 137853 | 218 | 105850 | 183766  |
| Distal TF                    | 4.58      | 1.46          | 490     | 40    | 42     | 10      | 42      | 30.7     | 170326 | 145 | 73377  | 361496  |
| Introns                      | 4.17      | 1.36          | 304     | 43    | 46     | 19      | 46      | 36       | 98201  | 331 | 145502 | 187359  |
| Enh Biv                      | 2.86      | 1.29          | 229     | 48    | 49     | 35      | 49      | 44       | 74176  | 406 | 169527 | 98442   |
| Intergenic                   | 1.98      | 1.26          | 509     | 51    | 50     | 7       | 51      | 36       | 185779 | 126 | 57924  | 22091   |
| ReprPC                       | 1.94      | 1.20          | 296     | 52    | 54     | 23      | 54      | 43       | 102492 | 339 | 141211 | 119952  |
| TxWk                         | 1.87      | 1.24          | 492     | 53    | 52     | 9       | 53      | 38       | 179317 | 143 | 64386  | 201299  |
| Distal H3K27ac.              | 1.35      | 1.20          | 523     | 54    | 55     | 6       | 55      | 38.3     | 193973 | 112 | 49730  | 632067  |
| Het                          | 1.10      | 1.12          | 358     | 55    | 60     | 15      | 60      | 43.3     | 130395 | 277 | 113308 | 119185  |
| <b>Enh excluding TssA</b>    | 1.03      | 1.18          | 555     | 56    | 57     | 4       | 57      | 39       | 208325 | 80  | 35378  | 346131  |
| Distal DNase                 | 0.80      | 1.21          | 602     | 61    | 53     | 1       | 61      | 38.3     | 228510 | 33  | 15193  | 1373967 |
| <b>Enh</b>                   | 0.74      | 1.13          | 568     | 62    | 59     | 3       | 62      | 41.3     | 214945 | 67  | 28758  | 415857  |
| Distal All                   | 0.71      | 1.18          | 602     | 63    | 56     | 1       | 63      | 40       | 228851 | 33  | 14852  | 1397221 |
| Distal H3K9ac                | 0.66      | 1.08          | 503     | 64    | 64     | 8       | 64      | 45.3     | 189715 | 132 | 53988  | 550604  |
| Distal H3K4me1               | 0.02      | 0.88          | 217     | 65    | 65     | 39      | 65      | 56.3     | 90692  | 418 | 153011 | 374953  |

## Supplementary References

1. Sheffield, N. C. & Bock, C. LOLA: enrichment analysis for genomic region sets and regulatory elements in R and Bioconductor. *Bioinformatics* **32**, 587 (2016).
2. Li, Y.-F., Li, H.-F., Zhang, Y.-B. & Wu, J.-M. Novel homozygous PANK2 mutation identified in a consanguineous Chinese pedigree with pantothenate kinase-associated neurodegeneration. *Biomed. Rep.* **5**, 217–220 (2016).
3. Orellana, D. I. *et al.* Coenzyme A corrects pathological defects in human neurons of PANK2-associated neurodegeneration. *EMBO Mol. Med.* **8**, 1197–1211 (2016).
4. Hoekstra, H. The secret of a natural blond. *Nat. Genet.* **46**, 660–661 (2014).
5. Guenther, C. A., Tasic, B., Luo, L., Bedell, M. A. & Kingsley, D. M. A molecular basis for classic blond hair color in Europeans. *Nat. Genet.* **46**, 748–752 (2014).
6. Reissmann, M. & Ludwig, A. Pleiotropic effects of coat colour-associated mutations in humans, mice and other mammals. *Semin. Cell Dev. Biol.* **24**, 576–586 (2013).
7. Meng, Q. *et al.* Identification of growth trait related genes in Large white purebred pig population by GWAS. *Asian-Australas. J. Anim. Sci.* (2016). doi:10.5713/ajas.16.0548
8. Ruchat, S.-M. *et al.* Evidence of interaction between type 2 diabetes susceptibility genes and dietary fat intake for adiposity and glucose homeostasis-related phenotypes. *J. Nutr. Nutr.* **2**, 225–234 (2009).
9. Li, X. *et al.* Variation in IGF2BP2 interacts with adiposity to alter insulin sensitivity in Mexican Americans. *Obes. Silver Spring Md* **17**, 729–736 (2009).
10. Wu, H.-H. *et al.* IGF2BP2 and obesity interaction analysis for type 2 diabetes mellitus in Chinese Han population. *Eur. J. Med. Res.* **19**, 40 (2014).
11. García-Gámez, E. *et al.* Using regulatory and epistatic networks to extend the findings of a genome scan: identifying the gene drivers of pigmentation in merino sheep. *PLoS One* **6**, e21158 (2011).

12. Imsland, F. *et al.* Regulatory mutations in TBX3 disrupt asymmetric hair pigmentation that underlies Dun camouflage color in horses. *Nat. Genet.* **48**, 152–158 (2016).
13. Karim, L. *et al.* Variants modulating the expression of a chromosome domain encompassing PLAG1 influence bovine stature. *Nat. Genet.* **43**, 405–413 (2011).
14. Littlejohn, M. *et al.* Genetic variation in PLAG1 associates with early life body weight and peripubertal weight and growth in *Bos taurus*. *Anim. Genet.* **43**, 591–594 (2012).
15. Nishimura, S. *et al.* Genome-wide association study identified three major QTL for carcass weight including the PLAG1-CHCHD7 QTN for stature in Japanese Black cattle. *BMC Genet.* **13**, 40 (2012).
16. Utsunomiya, Y. T. *et al.* Genome-wide mapping of loci explaining variance in scrotal circumference in Nellore cattle. *PLoS One* **9**, e88561 (2014).
17. Våge, D. I. & Boman, I. A. A nonsense mutation in the beta-carotene oxygenase 2 (BCO2) gene is tightly associated with accumulation of carotenoids in adipose tissue in sheep (*Ovis aries*). *BMC Genet.* **11**, 10 (2010).
18. Tian, R., Pitchford, W. S., Morris, C. A., Cullen, N. G. & Bottema, C. D. K. Genetic variation in the beta, beta-carotene-9', 10'-dioxygenase gene and association with fat colour in bovine adipose tissue and milk. *Anim. Genet.* **41**, 253–259 (2010).
19. Strychalski, J., Brym, P., Czarnik, U. & Gugolek, A. A novel AAT-deletion mutation in the coding sequence of the BCO2 gene in yellow-fat rabbits. *J. Appl. Genet.* **56**, 535–537 (2015).
20. Scatà, M. C. *et al.* Ovine acyl CoA:diacylglycerol acyltransferase 1- molecular characterization, polymorphisms and association with milk traits. *Anim. Genet.* **40**, 737–742 (2009).
21. Lehnert, K. *et al.* Phenotypic population screen identifies a new mutation in bovine DGAT1 responsible for unsaturated milk fat. *Sci. Rep.* **5**, 8484 (2015).
22. Lindholm-Perry, A. K. *et al.* Association, effects and validation of polymorphisms within the NCAPG - LCORL locus located on BTA6 with feed intake, gain, meat and carcass traits in beef cattle. *BMC Genet.* **12**, 103 (2011).

23. He, S., Zhang, L., Li, W. & Liu, M. BIEC2-808543 SNP in the LCORL Gene is Associated with Body Conformation in the Yili Horse. *Anim. Biotechnol.* **26**, 289–291 (2015).
24. Al-Mamun, H. A. *et al.* Genome-wide association study of body weight in Australian Merino sheep reveals an orthologous region on OAR6 to human and bovine genomic regions affecting height and weight. *Genet. Sel. Evol. GSE* **47**, 66 (2015).
25. Takasuga, A. PLAG1 and NCAPG-LCORL in livestock. *Anim. Sci. J. Nihon Chikusan Gakkaiho* **87**, 159–167 (2016).
26. Braglia, S. *et al.* Comparison of genetic models for analysing the effects of a PvuII polymorphism in the oestrogen receptor 1 (ESR1) gene on prolificacy in an Iberian x Meishan pig population. *Anim. Genet.* **37**, 454–458 (2006).
27. Muñoz, M. *et al.* Non-additive effects of RBP4, ESR1 and IGF2 polymorphisms on litter size at different parities in a Chinese-European porcine line. *Genet. Sel. Evol. GSE* **42**, 23 (2010).
28. Hudson, N. J., Reverter, A., Wang, Y., Greenwood, P. L. & Dalrymple, B. P. Inferring the transcriptional landscape of bovine skeletal muscle by integrating co-expression networks. *PLoS One* **4**, e7249 (2009).
29. Tallam, A. *et al.* Gene Regulatory Network Inference of Immuno-responsive Gene 1 (IRG1) Identifies Interferon Regulatory Factor 1 (IRF1) as Its Transcriptional Regulator in Mammalian Macrophages. *PLoS One* **11**, e0149050 (2016).
30. Rupp, R. *et al.* A Point Mutation in Suppressor of Cytokine Signalling 2 (Socs2) Increases the Susceptibility to Inflammation of the Mammary Gland while Associated with Higher Body Weight and Size and Higher Milk Production in a Sheep Model. *PLoS Genet.* **11**, e1005629 (2015).
31. Wu, S. *et al.* Genome-wide scans reveal variants at EDAR predominantly affecting hair straightness in Han Chinese and Uyghur populations. *Hum. Genet.* **135**, 1279–1286 (2016).
32. Ji, X.-Y. *et al.* Comparative Transcriptome Analysis Reveals that a Ubiquitin-Mediated Proteolysis Pathway Is Important for Primary and Secondary Hair Follicle Development in Cashmere Goats. *PLoS One* **11**, e0156124 (2016).

33. Lu, J. *et al.* Transcript characteristic of myostatin in sheep fibroblasts. *J. Cell. Biochem.* **113**, 2652–2660 (2012).
34. Huang, J. *et al.* Inferring the Skeletal Muscle Developmental Changes of Grazing and Barn-Fed Goats from Gene Expression Data. *J. Agric. Food Chem.* **64**, 6791–6800 (2016).
35. Osterwalder, M. *et al.* HAND2 targets define a network of transcriptional regulators that compartmentalize the early limb bud mesenchyme. *Dev. Cell* **31**, 345–357 (2014).
36. Brown, H. M., Fabre Nys, C., Cognié, J. & Scaramuzzi, R. J. Short oestrous cycles in sheep during anoestrus involve defects in progesterone biosynthesis and luteal neovascularisation. *Reprod. Camb. Engl.* **147**, 357–367 (2014).
37. Kijas, J. W. *et al.* Genome-Wide Analysis of the World's Sheep Breeds Reveals High Levels of Historic Mixture and Strong Recent Selection. *PLOS Biol* **10**, e1001258 (2012).
38. Norris, B. J. & Whan, V. A. A gene duplication affecting expression of the ovine ASIP gene is responsible for white and black sheep. *Genome Res.* **18**, 1282–1293 (2008).
39. Takahashi, K. & Yamanaka, S. Induction of pluripotent stem cells from mouse embryonic and adult fibroblast cultures by defined factors. *Cell* **126**, 663–676 (2006).
40. Tarabeux, J. *et al.* Rare mutations in N-methyl-D-aspartate glutamate receptors in autism spectrum disorders and schizophrenia. *Transl. Psychiatry* **1**, e55 (2011).
41. Haase, B., Jagannathan, V., Rieder, S. & Leeb, T. A novel KIT variant in an Icelandic horse with white-spotted coat colour. *Anim. Genet.* **46**, 466 (2015).
42. Szczerbal, I. *et al.* Ectopic position of duplicated KIT gene in African Nguni cattle, associated with color sidedness, confirms its shared ancestry with the *Bos taurus* lineage. *Anim. Genet.* (2016). doi:10.1111/age.12495
43. Villar, D. *et al.* Enhancer Evolution across 20 Mammalian Species. *Cell* **160**, 554 (2015).
